# Supplementary material
Source: PubMed Central journal article supplement (PMC6482889)
Supplement: Supp_Table1.pdf [file Supp_Table1.pdf]

## Supplementary Data

SUPPLEMENTARY TABLE S1. PREVALENCE OF CULTURAL/FOLK BELIEFS CHARACTERISTICS (PERCENTAGE AGREEMENT WITH STATEMENT) BY SELECTED CHARACTERISTICS

| <i>Cultural and folk beliefs</i>                                              | <i>Age (years)</i> |                     |              | <i>Educational level</i> |                    |                         |                    | <i>Income</i>             |                  |      | <i>p</i> |        |
|-------------------------------------------------------------------------------|--------------------|---------------------|--------------|--------------------------|--------------------|-------------------------|--------------------|---------------------------|------------------|------|----------|--------|
|                                                                               | <i>&lt;40</i>      | <i>40 to &lt;60</i> | <i>≥60</i>   | <i>&lt;HS</i>            | <i>HS graduate</i> | <i>College graduate</i> | <i>&lt;US\$25K</i> | <i>US\$25K to &lt;50K</i> | <i>≥US\$50K</i>  |      |          |        |
|                                                                               | <i>n=142 (%)</i>   | <i>n=206 (%)</i>    | <i>n=251</i> | <i>n=90 (%)</i>          | <i>n=327 (%)</i>   | <i>n=182 (%)</i>        | <i>n=271 (%)</i>   | <i>n=149 (%)</i>          | <i>n=167 (%)</i> |      |          |        |
| “Air causes a cancer to grow faster”                                          | 18.4               | 29.6                | 21.2         | 0.03                     | 30.7               | 21.7                    | 23.1               | 0.21                      | 27.5             | 24.8 | 16.8     | 0.04   |
| “Surgery causes a cancer to grow faster”                                      | 12.1               | 18.5                | 17.7         | 0.24                     | 25.0               | 16.6                    | 12.6               | 0.04                      | 23.1             | 14.1 | 9.0      | 0.0004 |
| “People with high blood pressure are more likely to get cancer”               | 7.1                | 5.3                 | 5.7          | 0.78                     | 10.2               | 5.2                     | 5.0                | 0.17                      | 8.6              | 1.3  | 5.4      | 0.01   |
| “Someone can give you cancer by putting a root or spell on you”               | 1.4                | 1.9                 | 0.8          | 0.57                     | 0.0                | 1.2                     | 2.2                | 0.33                      | 1.5              | 1.3  | 1.2      | 0.97   |
| “If a person worries about their cancer, it will get worse”                   | 52.5               | 45.4                | 43.4         | 0.21                     | 49.4               | 44.2                    | 48.4               | 0.53                      | 46.6             | 47.7 | 46.7     | 0.98   |
| “If a person prays about cancer, God will heal it without medical treatments” | 41.4               | 39.0                | 39.5         | 0.90                     | 48.3               | 42.3                    | 31.1               | 0.01                      | 47.6             | 37.8 | 28.1     | 0.0003 |
| “The devil can cause a person to get cancer”                                  | 5.7                | 10.2                | 6.8          | 0.24                     | 9.1                | 7.7                     | 7.1                | 0.85                      | 9.3              | 6.7  | 6.6      | 0.49   |
| “When I get sick, I am to blame”                                              | 6.4                | 3.9                 | 7.2          | 0.31                     | 4.6                | 7.0                     | 4.4                | 0.41                      | 6.3              | 8.1  | 3.0      | 0.14   |
| “If it’s meant to be, I will stay healthy”                                    | 41.8               | 38.1                | 40.0         | 0.77                     | 50.6               | 40.1                    | 34.1               | 0.03                      | 42.9             | 42.3 | 31.1     | 0.04   |
| “Health professionals control my health”                                      | 22.0               | 21.5                | 23.2         | 0.90                     | 35.2               | 23.9                    | 13.2               | 0.0001                    | 32.0             | 15.4 | 13.9     | <0.001 |

  

| <i>Cultural and folk beliefs</i>                                              | <i>Region</i>    |                  |          | <i>Family history of ovarian or breast cancer</i> |                  |          |
|-------------------------------------------------------------------------------|------------------|------------------|----------|---------------------------------------------------|------------------|----------|
|                                                                               | <i>North</i>     | <i>South</i>     | <i>p</i> | <i>Yes</i>                                        | <i>No</i>        | <i>p</i> |
|                                                                               | <i>n=136 (%)</i> | <i>n=463 (%)</i> |          | <i>n=164 (%)</i>                                  | <i>n=420 (%)</i> |          |
| “Air causes a cancer to grow faster”                                          | 21.3             | 24.1             | 0.51     | 24.4                                              | 23.2             | 0.76     |
| “Surgery causes a cancer to grow faster”                                      | 11.9             | 18.0             | 0.09     | 14.6                                              | 17.5             | 0.40     |
| “People with high blood pressure are more likely to get cancer”               | 5.2              | 6.1              | 0.71     | 5.5                                               | 6.0              | 0.81     |
| “Someone can give you cancer by putting a root or spell on you”               | 1.5              | 1.3              | 0.88     | 1.8                                               | 1.2              | 0.55     |
| “If a person worries about their cancer, it will get worse”                   | 38.2             | 48.6             | 0.03     | 53.1                                              | 44.0             | 0.05     |
| “If a person prays about cancer, God will heal it without medical treatments” | 31.1             | 42.4             | 0.02     | 37.4                                              | 40.4             | 0.51     |
| “The devil can cause a person to get cancer”                                  | 5.9              | 8.2              | 0.38     | 12.2                                              | 6.2              | 0.02     |
| “When I get sick, I am to blame”                                              | 6.6              | 5.6              | 0.67     | 7.3                                               | 5.5              | 0.41     |
| “If it’s meant to be, I will stay healthy”                                    | 44.1             | 38.5             | 0.24     | 32.3                                              | 42.9             | 0.02     |
| “Health professionals control my health”                                      | 14.7             | 24.6             | 0.15     | 17.7                                              | 24.5             | 0.08     |

HS, high school.
