# Supplementary material
Source: PubMed Central journal article supplement (PMC6482889)
Supplement: Supp_Table2.pdf [file Supp_Table2.pdf]

SUPPLEMENTARY TABLE S2. PREVALENCE OF RELIGIOUS PRACTICES AND PERCEIVED SPIRITUALITY BY SELECTED CHARACTERISTICS

|                                                                               | Age (years) |           |           | Educational Level |             |                  | Income    |                    |           | p    |
|-------------------------------------------------------------------------------|-------------|-----------|-----------|-------------------|-------------|------------------|-----------|--------------------|-----------|------|
|                                                                               | <40         | 40 to <60 | ≥60       | <HS               | HS graduate | College graduate | <US\$25K  | US\$25 to <US\$50K | ≥US\$50K  |      |
|                                                                               | n=142 (%)   | n=206 (%) | n=251 (%) | n=90 (%)          | n=327 (%)   | n=182 (%)        | n=271 (%) | n=149 (%)          | n=167 (%) |      |
| <i>Religiosity/spirituality</i>                                               |             |           |           |                   |             |                  |           |                    |           |      |
| Religious service attendance                                                  |             |           |           |                   |             |                  |           |                    |           | 0.19 |
| Never                                                                         | 4.2         | 9.7       | 4.0       | 8.9               | 6.1         | 4.4              | 6.6       | 5.4                | 6.0       |      |
| <1 ×/month                                                                    | 16.9        | 7.8       | 9.2       | 13.3              | 10.1        | 9.9              | 11.1      | 6.7                | 12.6      |      |
| 1 ×/month                                                                     | 16.2        | 8.3       | 5.2       | 13.3              | 9.2         | 6.0              | 10.0      | 8.7                | 7.8       |      |
| 2-3 ×/month                                                                   | 20.4        | 18.0      | 9.6       | 16.7              | 14.1        | 15.9             | 16.6      | 12.1               | 15.0      |      |
| 1 ×/week                                                                      | 31.7        | 39.3      | 42.6      | 27.8              | 37.6        | 46.7             | 33.2      | 43.6               | 44.3      |      |
| Several times/week                                                            | 10.6        | 17.0      | 29.5      | 20.0              | 22.9        | 17.0             | 22.5      | 23.5               | 14.4      |      |
| Frequency of prayer                                                           |             |           |           |                   |             |                  |           |                    |           | 0.39 |
| Rarely or never                                                               | 3.5         | 1.5       | 1.6       | 3.3               | 1.5         | 2.2              | 1.5       | 2.7                | 1.8       |      |
| 1 ×/week                                                                      | 0           | 2.9       | 1.2       | 2.2               | 1.2         | 1.7              | 2.2       | 0.7                | 1.2       |      |
| Several times/week                                                            | 2.8         | 3.9       | 2.4       | 2.2               | 3.1         | 3.3              | 1.9       | 3.4                | 4.2       |      |
| 1-2 ×/day                                                                     | 26.1        | 23.8      | 28.7      | 23.3              | 24.5        | 31.3             | 23.3      | 25.5               | 31.1      |      |
| Many times/day                                                                | 67.6        | 68.0      | 66.1      | 68.9              | 69.7        | 61.5             | 71.2      | 67.8               | 61.7      |      |
| Extent of religion/spirituality involved in dealing with stressful situations |             |           |           |                   |             |                  |           |                    |           | 0.14 |
| Not at all                                                                    | 2.1         | 1.5       | 1.6       | 2.2               | 1.5         | 1.6              | 1.1       | 3.4                | 0.6       |      |
| Not very                                                                      | 2.8         | 1.9       | 1.2       | 6.7               | 1.5         | 0.0              | 2.6       | 1.3                | 0.6       |      |
| Somewhat                                                                      | 18.3        | 11.7      | 11.6      | 15.6              | 14.7        | 9.3              | 14.0      | 9.4                | 15.6      |      |
| Very                                                                          | 76.8        | 85.0      | 85.7      | 75.6              | 82.3        | 89.0             | 82.3      | 85.9               | 83.2      |      |
| Extent you consider yourself a religious/spiritual person                     |             |           |           |                   |             |                  |           |                    |           | 0.02 |
| Not at all                                                                    | 1.4         | 2.0       | 0.4       | 2.2               | 1.2         | 0.6              | 1.1       | 2.0                | 0.0       |      |
| Slightly                                                                      | 8.5         | 5.9       | 2.8       | 15.6              | 4.0         | 2.2              | 8.6       | 2.0                | 3.0       |      |
| Moderately                                                                    | 36.6        | 28.8      | 28.0      | 27.8              | 30.5        | 31.3             | 27.1      | 31.5               | 35.3      |      |
| Very                                                                          | 53.5        | 63.4      | 68.8      | 54.4              | 64.3        | 65.9             | 63.2      | 64.4               | 61.7      |      |

(continued)

SUPPLEMENTARY TABLE S2. (CONTINUED)

|                                                                                  | Region               |                      |      | Family history of ovarian or breast cancer |                   | p    |
|----------------------------------------------------------------------------------|----------------------|----------------------|------|--------------------------------------------|-------------------|------|
|                                                                                  | North<br>n = 136 (%) | South<br>n = 463 (%) | p    | Yes<br>n = 164 (%)                         | No<br>n = 420 (%) |      |
| Religious service attendance                                                     |                      |                      | 0.03 |                                            |                   | 0.25 |
| Never                                                                            | 9.6                  | 5.0                  |      | 5.5                                        | 6.2               |      |
| <1 ×/month                                                                       | 13.2                 | 9.7                  |      | 11.6                                       | 10.0              |      |
| 1 ×/month                                                                        | 11.8                 | 8.0                  |      | 7.3                                        | 9.8               |      |
| 2-3 ×/month                                                                      | 18.4                 | 14.0                 |      | 13.4                                       | 15.7              |      |
| 1 ×/week                                                                         | 30.2                 | 41.5                 |      | 35.4                                       | 40.2              |      |
| Several times/week                                                               | 16.9                 | 21.8                 |      | 26.8                                       | 18.1              |      |
| Frequency of prayer                                                              |                      |                      | 0.33 |                                            |                   | 0.63 |
| Rarely or never                                                                  | 2.2                  | 1.9                  |      | 2.4                                        | 1.7               |      |
| 1 ×/week                                                                         | 1.5                  | 1.5                  |      | 1.2                                        | 1.7               |      |
| Several times/week                                                               | 5.2                  | 2.4                  |      | 4.3                                        | 2.4               |      |
| 1-2 ×/day                                                                        | 30.2                 | 25.3                 |      | 23.8                                       | 27.4              |      |
| Many times/day                                                                   | 61.0                 | 68.9                 |      | 68.3                                       | 66.9              |      |
| Extent of religion/spirituality involved<br>in dealing with stressful situations |                      |                      | 0.32 |                                            |                   | 0.25 |
| Not at all                                                                       | 2.9                  | 1.3                  |      | 3.1                                        | 1.0               |      |
| Not very                                                                         | 2.9                  | 1.5                  |      | 1.2                                        | 2.1               |      |
| Somewhat                                                                         | 14.7                 | 12.7                 |      | 12.2                                       | 13.8              |      |
| Very                                                                             | 79.4                 | 84.5                 |      | 83.5                                       | 83.1              |      |
| Extent you consider yourself a religious/spiritual person                        |                      |                      | 0.31 |                                            |                   | 0.07 |
| Not at all                                                                       | 2.2                  | 0.9                  |      | 1.8                                        | 0.7               |      |
| Slightly                                                                         | 2.9                  | 5.9                  |      | 1.8                                        | 6.7               |      |
| Moderately                                                                       | 32.4                 | 29.7                 |      | 29.9                                       | 31.0              |      |
| Very                                                                             | 62.5                 | 63.6                 |      | 66.5                                       | 61.6              |      |
